# Supplementary material for: Agarose-biofunctionalized, dual-electrospun heteronanofiber mats: toward metal-ion chelating battery separator membranes
Source: Royal Society of Chemistry journal article supplement (doi:10.1039/c5ta02445e), 2015-01-01
Supplement: c5ta02445e1.pdf [file c5ta02445e1.pdf]

## Supplementary Information

### **Agarose-biofunctionalized, dual-electrospun heteronanofiber mats: Toward metal-ion chelating battery separator membranes**

*Ju-Myung Kim, Chanhoon Kim, Seungmin Yoo, Jeong-Hoon Kim, Jung-Hwan Kim, Jun-Muk Lim, Soojin Park\*, and Sang-Young Lee\**

#### **Experimental Section**

##### **Structural design and fabrication of dual-electrospun heteronanofiber mat (= AHM separator)**

To fabricate the AHM separator, two different polymer solutions were respectively prepared. Agarose and PAA were mixed in DMF at 90 °C for 12 h, where the composition ratio of agarose/PAA was 50/50 (w/w). At the same time, 10 wt% PAN solution (solvent = DMF) was prepared. Both the agarose/PAA solution and the PAN one were simultaneously dual-electrospun via different nozzles at room temperature/30 RH%. The detailed electrospinning conditions were 7.5 kV with a feed rate of 10  $\mu\text{L min}^{-1}$  (for agarose/PAA solution) and 8.5 kV with a feed rate of 10  $\mu\text{L min}^{-1}$  (for PAN solution). The dual-electrospun (agarose/PAA)/PAN nanofiber mat was collected on a stainless steel plate positioned at a distance of 9 cm from the electrospinning nozzles. Subsequently, the dual-electrospun (agarose/PAA)/PAN heteronanofiber mat was subjected to thermal condensation (150 °C/2 h in a vacuum oven) and then roll-pressed at room temperature, leading to the AHM Separator (average thickness ~ 25  $\mu\text{m}$ ). A commercial PE separator (thickness = 20  $\mu\text{m}$ , Tonen) was chosen as a control sample.

##### **Structural/physicochemical characterization of AHM separator**

The porous structure of the AHM separator was analyzed with FE-SEM (S-4800, Hitachi), EDS (JSM 6400, JEOL) and Gurley densometer (4110N, Gurley). The intermolecular hydrogen bonding between agarose and PAA was examined using FT-IR spectrometer (670-IR, Agilent). The tensile properties of the separators were measured using a universal testing machine (AGS-100NX, SHIMADZU). The electrolyte wettability of the separators was quantitatively estimated by measuring the electrolyte immersion-height. The thermal shrinkage of the separators was determined by measuring their area-based dimensional change after exposure to 150 °C/0.5 h. To quantitatively estimate the Mn<sup>2+</sup> chelation ability of separators, manganese perchlorate solution (10 mM Mn(ClO<sub>4</sub>)<sub>2</sub>-containing 1.3 M LiPF<sub>6</sub> in EC/PC = 1/1 v/v) was prepared. After being soaked in the solution for 2 h at room temperature, the separators were washed with pristine EC/PC solvents (containing no LiPF<sub>6</sub> salts) and then the amount of the captured Mn<sup>2+</sup> ions was analyzed by ICP-MS (ELAN DRC-II, Perkin Elmer). The interaction between Mn<sup>2+</sup> ions and agarose was examined using <sup>13</sup>C NMR (400-MR DD2, Agilent).

### **Application of AHM separator to lithium-ion batteries**

The electrochemical stability window of the AHM separator was investigated using a linear sweep voltammetry experiment performed on a working electrode of stainless-steel and a counter/reference electrode of lithium-metal at a scan rate of 1.0 mV s<sup>-1</sup>. For the OCV drop measurement, the cell was pre-cycled twice at a charge/discharge current density of 0.1 C, and then fully charged at a current density of 0.2 C to 100 % charge state. Finally, the OCV drop of the fully charged cell was monitored as a function of elapsed time. The ion conductivity of the AHM separator was examined by an AC impedance analysis (VSP classic, Bio-Logic) over a frequency range of 10<sup>-2</sup> - 10<sup>6</sup> Hz. A unit cell (2032-type coin) was assembled by sandwiching a separator between LMO cathode (LMO/carbon black/PVdF binder = 92/3/5 w/w/w) and Li metal anode, and then activated by being filled with the liquid electrolyte (1 M LiPF<sub>6</sub> in EC/DEC = 1/1 v/v). The cell performance was investigated using a cycle tester (PNE Solution) at various

charge/discharge conditions. The structural change of electrode surface and separators after the cycling test was analyzed using XPS (ThermoFisher) with focused monochromatized Al K $\alpha$  radiation and also ICP-MS measurement.

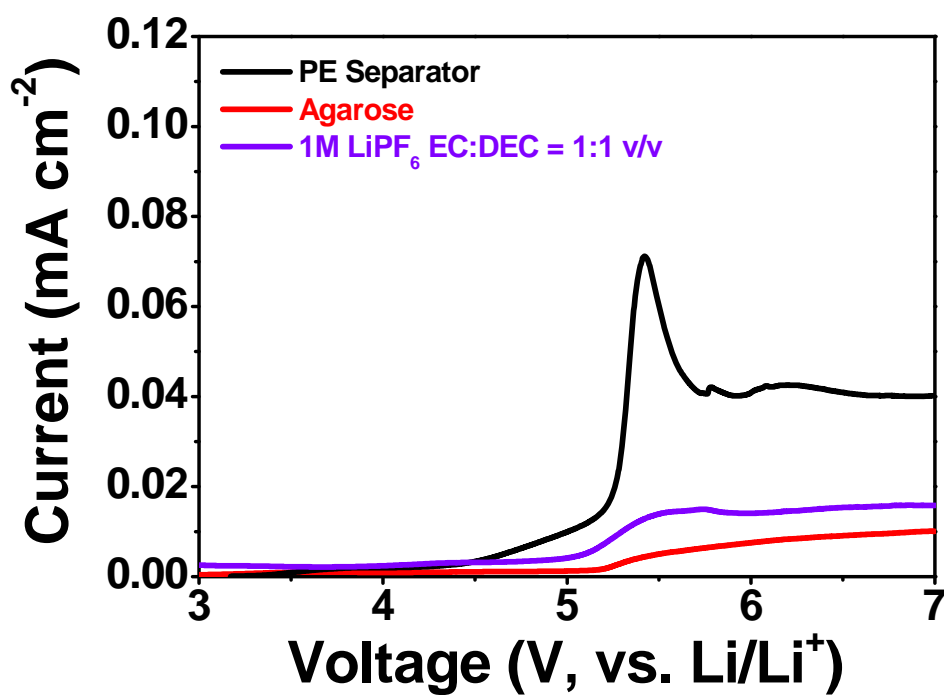

**Fig. S1.** Comparison in electrochemical stability between agarose film and PE Separator, where a linear sweep voltammetry experiment was performed on a working electrode of stainless steel and a counter and reference electrode of lithium-metal at a scan rate of  $1 \text{ mV s}^{-1}$ .

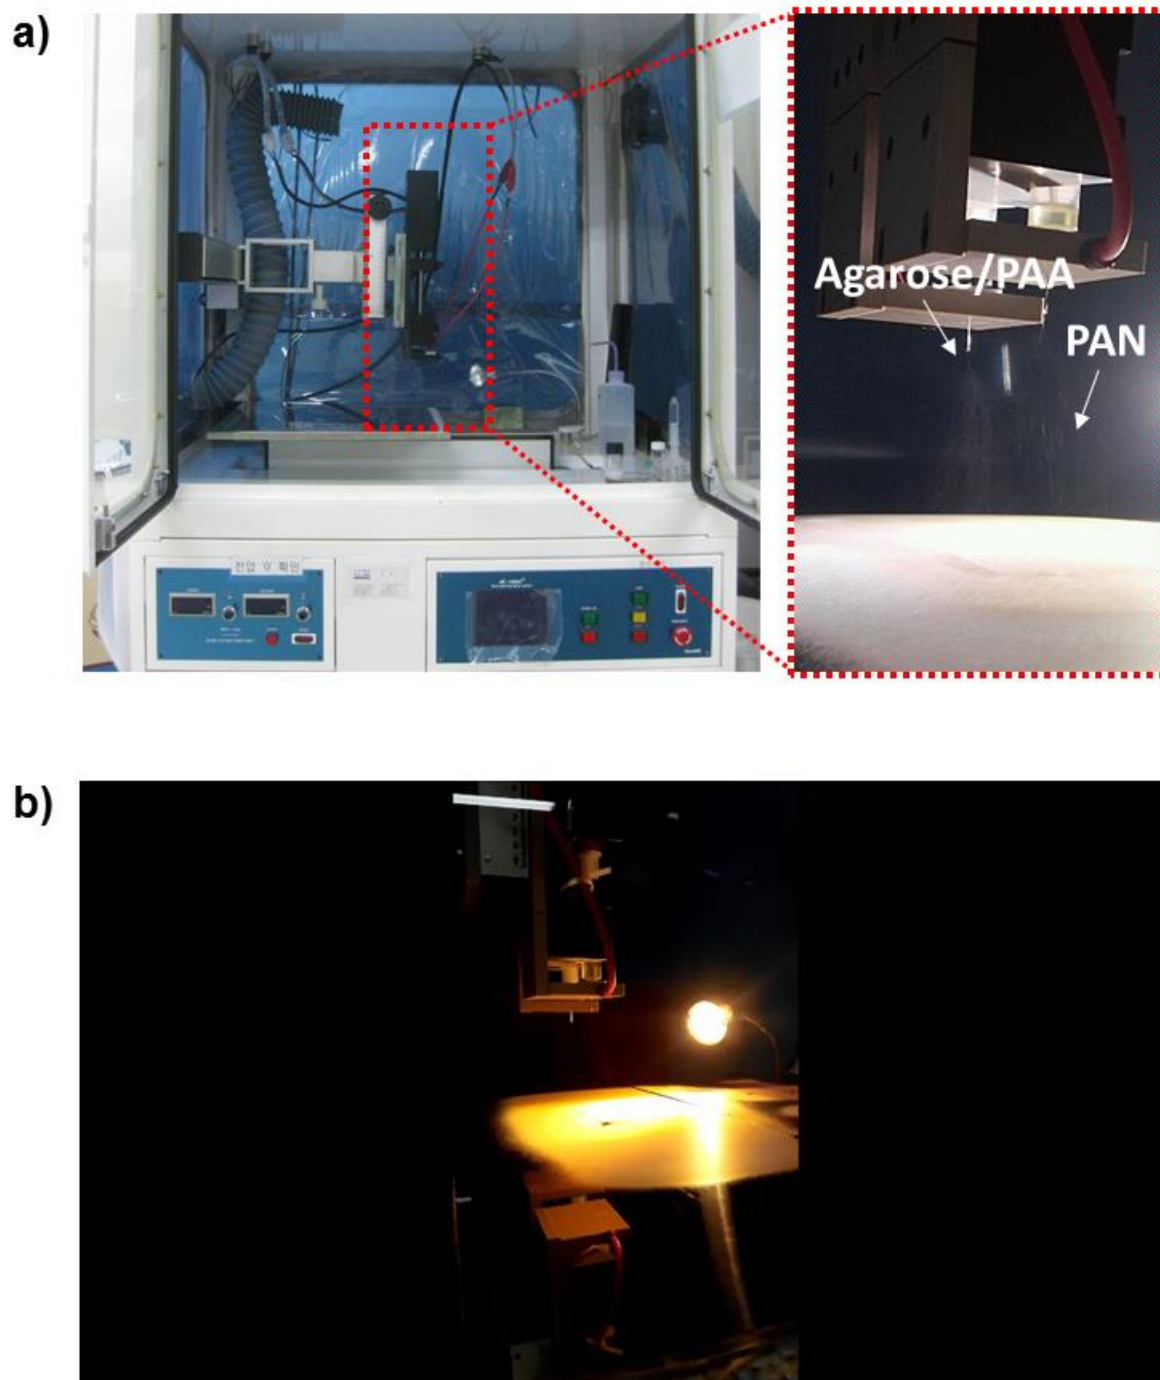

**Fig. S2.** Experimental operation of the dual electrospinning process used for AHM separator: (a) photographs; (b) video clip.

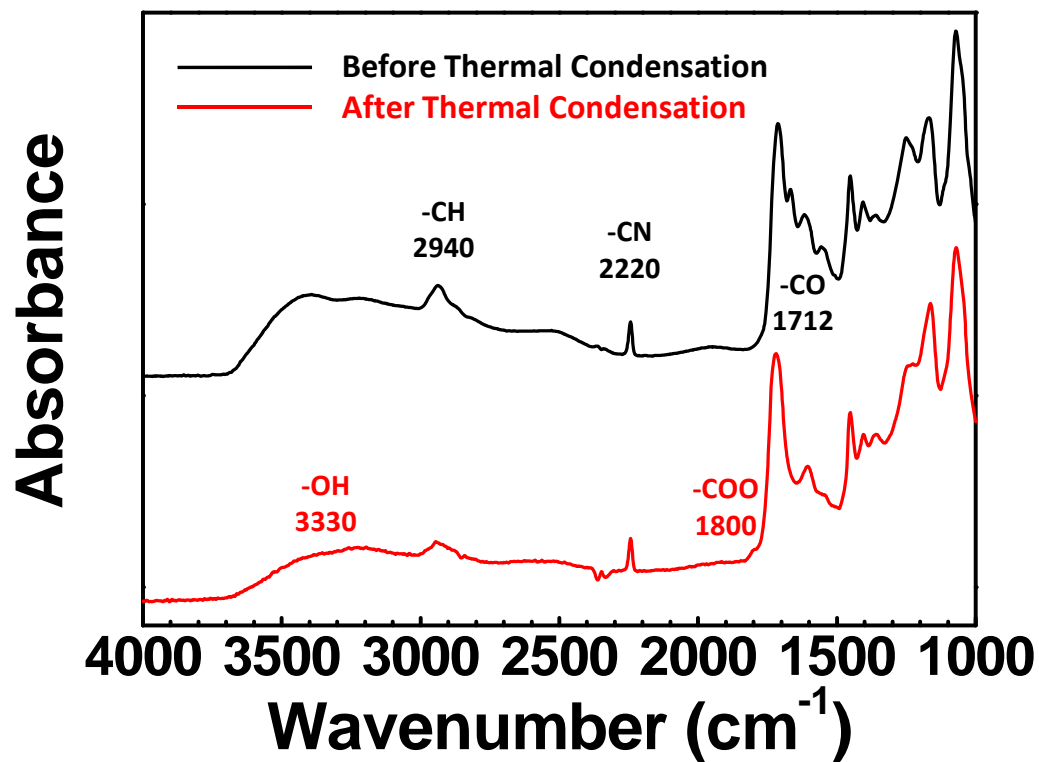

**Fig. S3.** FT-IR spectra showing the variation in the characteristic peaks assigned to the hydroxyl groups of agarose in the agarose/PAA nanofiber mat, before/after being subjected to thermal condensation (150 °C/2 h in a vacuum oven).

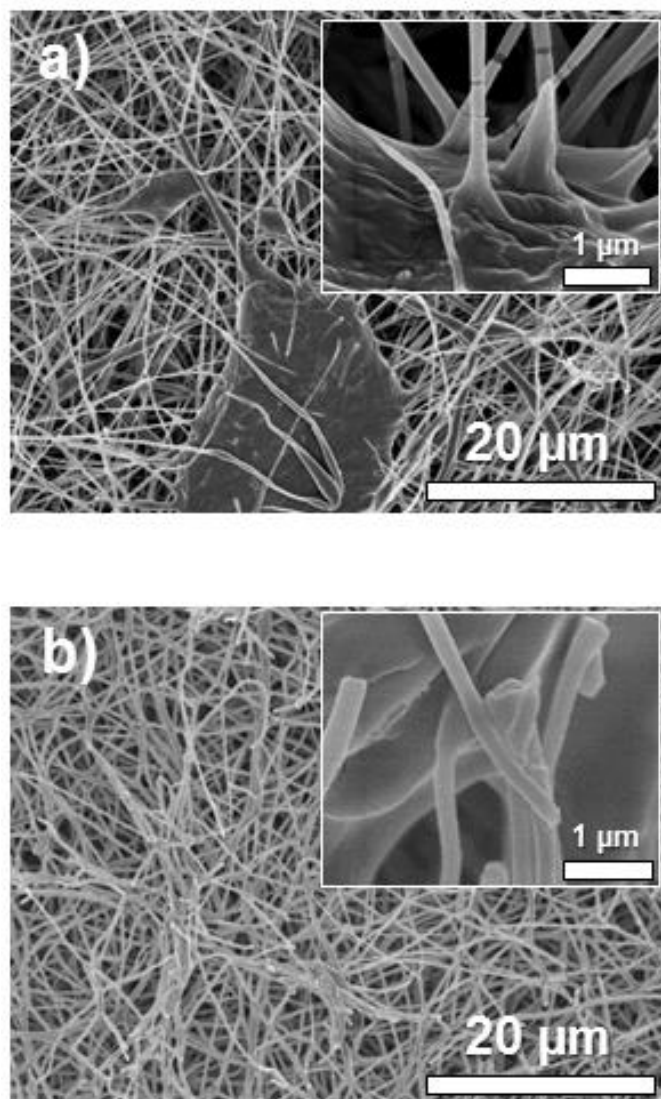

**Fig. S4.** Effect of agarose/PAA composition ratio on the porous structure evolution of agarose/PAA electrospun nanofiber mat: (a) agarose/PAA = 70/30 (w/w); (b) agarose/PAA = 30/70 (w/w).

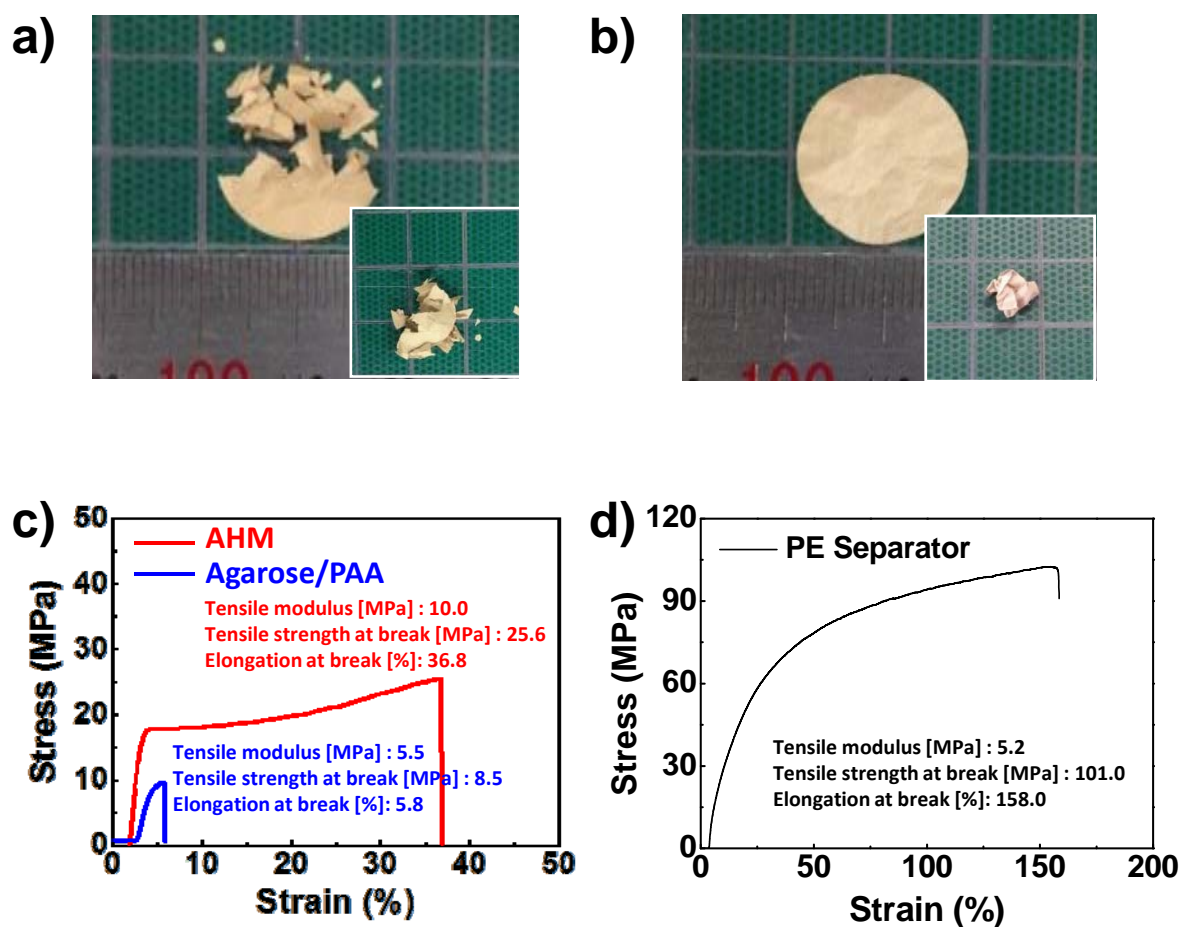

**Fig. S5.** Comparison in dimensional tolerance upon mechanical deformation (= wrinkling): (a) agarose/PAA nanofiber mat (wrinkled  $\rightarrow$  unwrinkled); (b) (agarose/PAA)/PAN AHM separator (wrinkled  $\rightarrow$  unwrinkled), wherein inset images show the wrinkled state of each separator. Stress-strain curves of: (c) agarose/PAA nanofiber mat and (agarose/PAA)/PAN AHM separator (measured at a strain rate of  $10 \text{ mm min}^{-1}$ ); (d) PE separator.



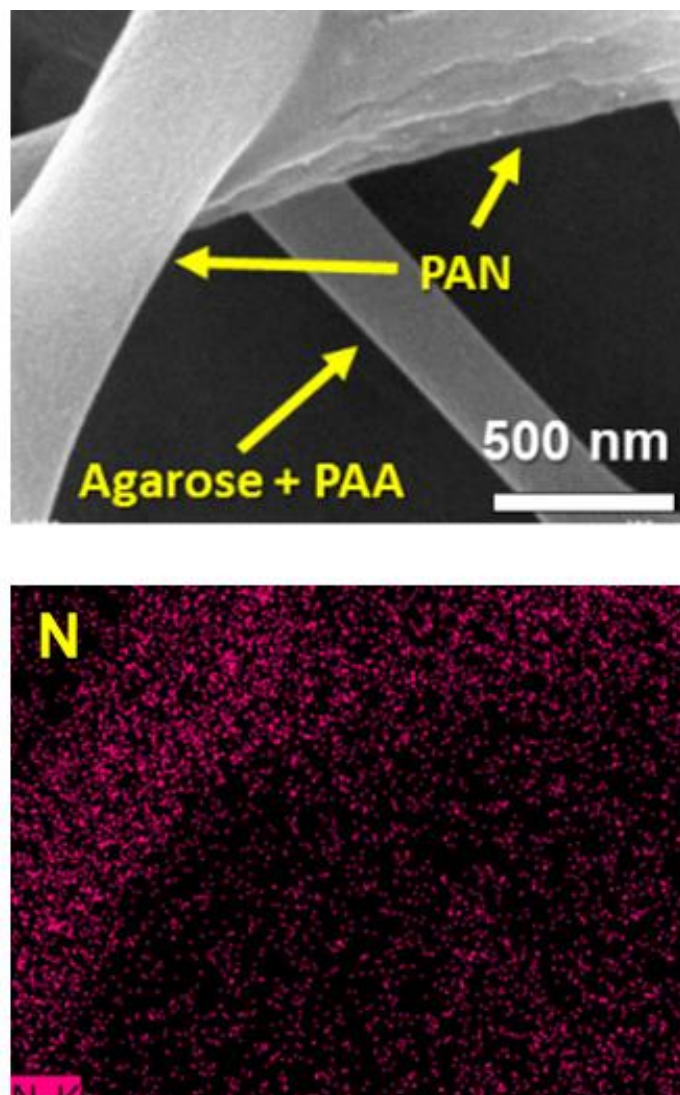

**Fig. S6.** Structural analysis of (agarose/PAA)/PAN AHM separator: (a) SEM image; (b) EDS image (with a particular focus on N element).

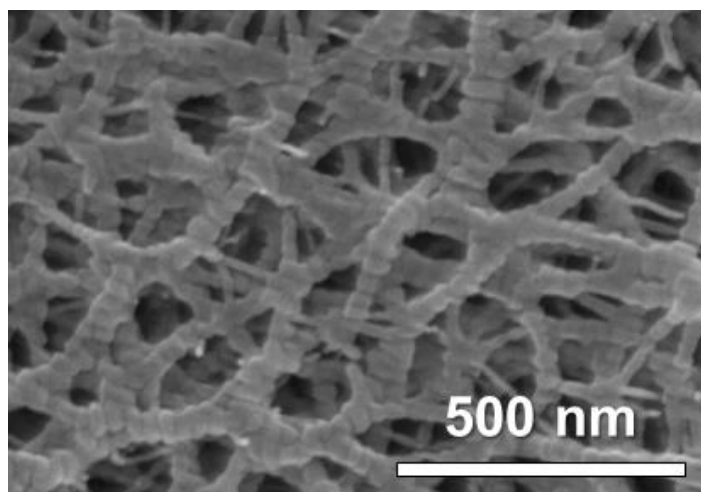

**Fig. S7.** SEM image (surface view) of PE separator.

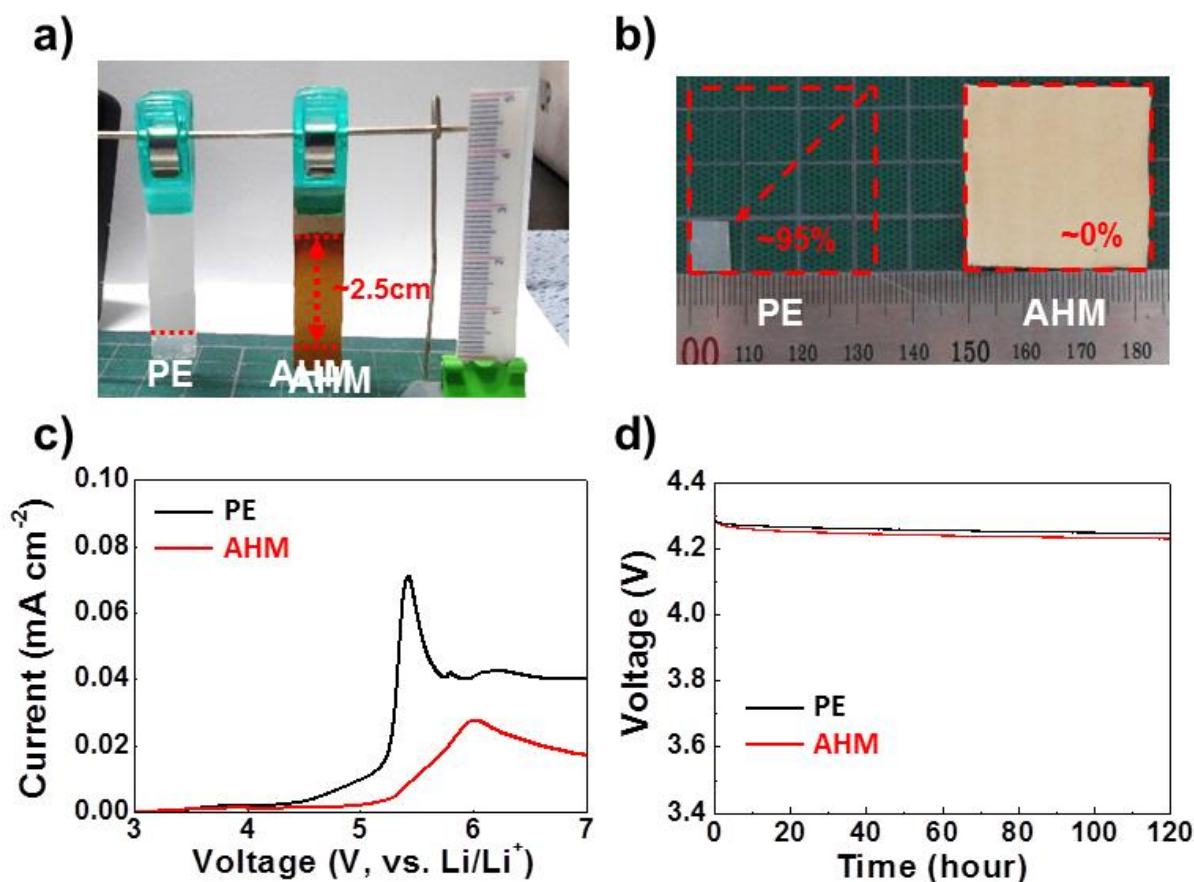

**Fig. S8.** Comparison in major membrane properties between AHM separator and PE separator: (a) electrolyte wettability (determined by electrolyte-immersion height); (b) thermal shrinkage after exposure to 150 °C/0.5 h; (c) linear sweep voltammograms; (d) OCV profiles of cells, where the cells were charged to 4.3 V at constant current density of 0.2 C and their voltage drop was measured as a function of the elapsed time.

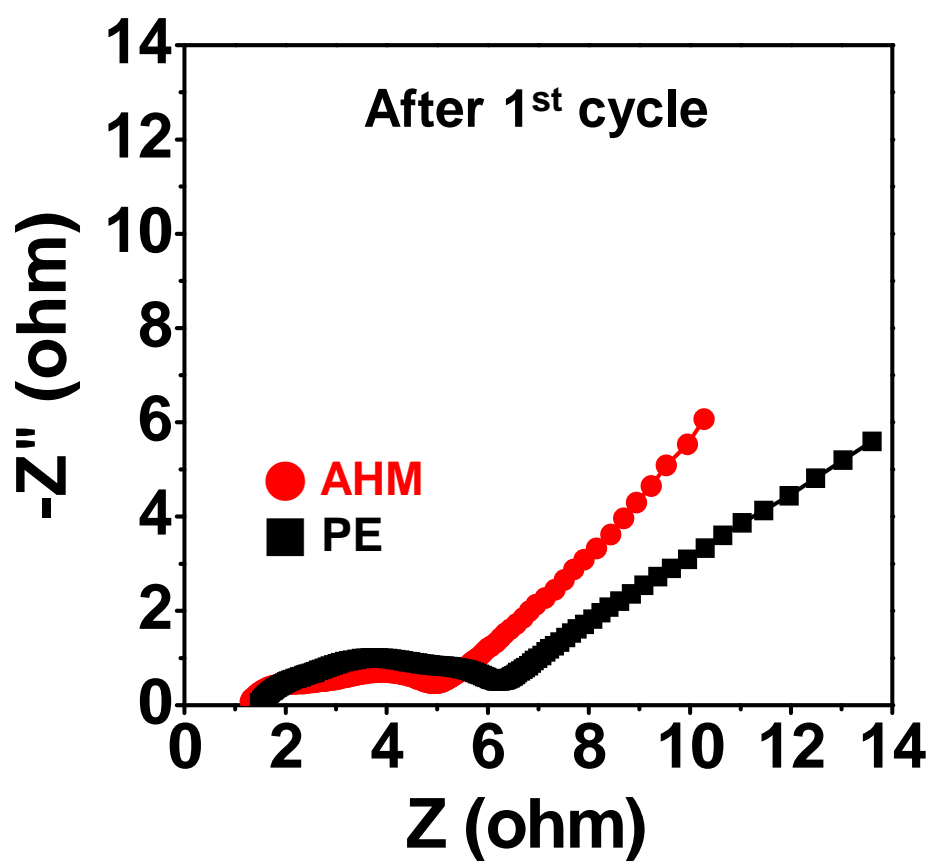

**Fig. S9.** Comparison in AC impedance spectra after 1<sup>st</sup> cycle between AHM separator and PE separator.

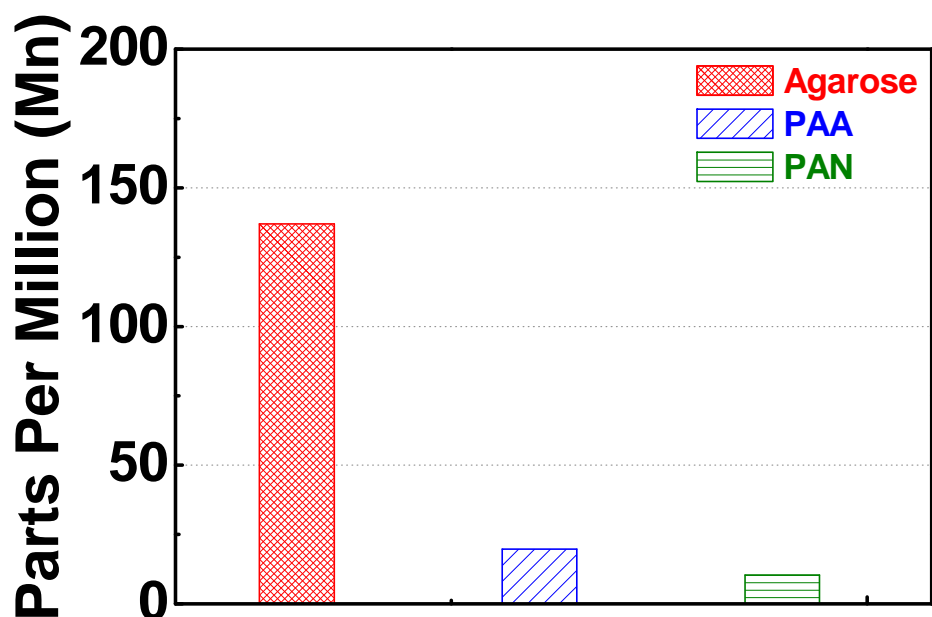

**Fig. S10.** Quantitative analysis of  $\text{Mn}^{2+}$  chelation ability of Agarose, PAN and PAA films, where the polymer films were soaked in the  $\text{Mn}(\text{ClO}_4)_2$  solution (10 mM  $\text{Mn}(\text{ClO}_4)_2$ -containing 1.3 M  $\text{LiPF}_6$  in  $\text{EC}/\text{PC} = 1/1$  v/v) for 2 h at room temperature and then the amount of the captured  $\text{Mn}^{2+}$  ions was analyzed by ICP-MS measurement.

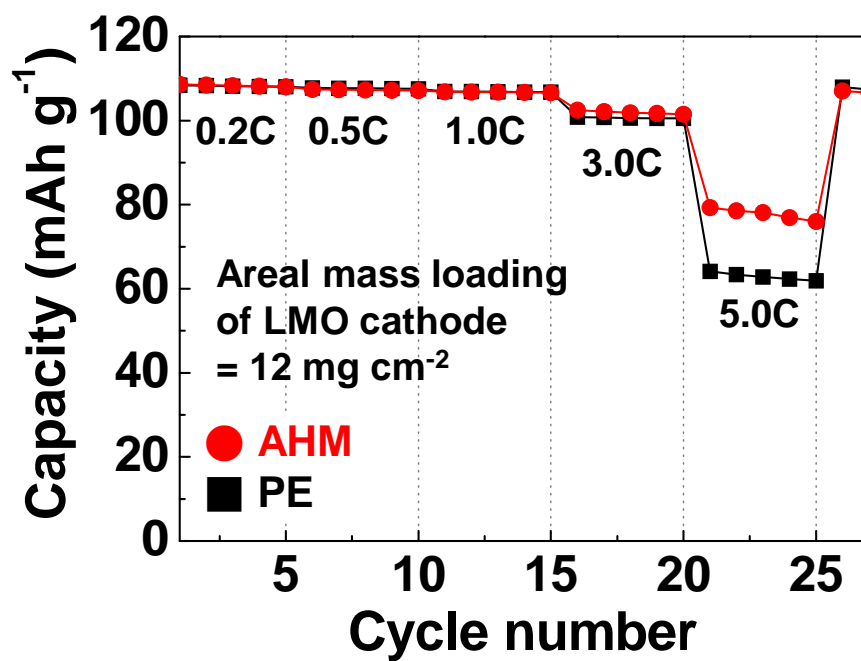

**Fig. S11.** Discharge rate performance of AHM separator (vs. PE separator) for low mass loading LMO cathode ( $= 12 \text{ mg cm}^{-2}$ ).

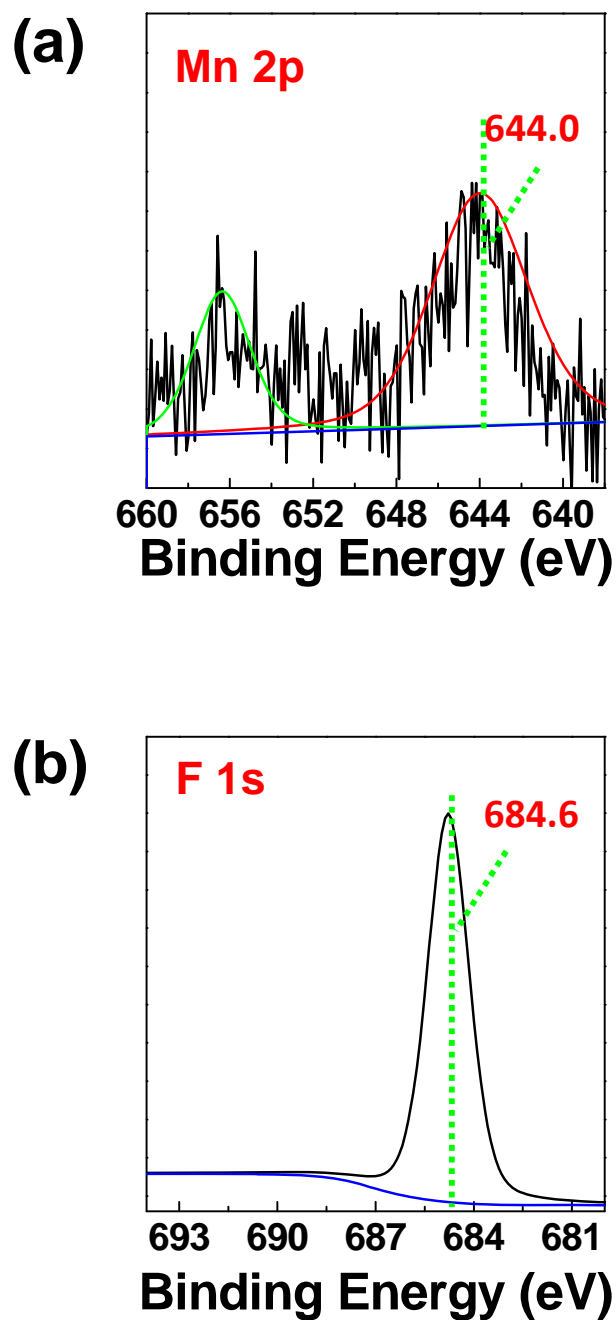

**Fig. S12.** XPS analysis of AHM separator adjacent to LMO cathode after 100 cycles at 60 °C: (a) Mn 2p spectra; (b) F 1s spectra.

**Table S1.** Major membrane properties of AHM separator and PE separator.

|               | Thickness<br>(mm) | Porosity<br>(%) | Gurley value<br>(sec 100cc <sup>-1</sup> ) | Ionic conductivity, $\sigma_S$<br>(mS cm <sup>-1</sup> ) | MacMullin number, $N_M$ |
|---------------|-------------------|-----------------|--------------------------------------------|----------------------------------------------------------|-------------------------|
| AHM Separator | 25                | 75              | 17                                         | 0.87                                                     | 8.68                    |
| PE Separator  | 10                | 45              | 240                                        | 0.65                                                     | 11.27                   |

$$*N_M = \sigma_0 / \sigma_S$$

\* $\sigma_0$  = ionic conductivity of liquid electrolyte (1 M LiPF<sub>6</sub> in EC/DEC = 1:1 v/v) (= 7.55 mS cm<sup>-1</sup>).
